# Supplementary material
Source: PubMed Central journal article supplement (PMC3645540)
Supplement: 1305782110_pnas.201305782SI.pdf [file 1305782110_pnas.201305782SI.pdf]

# Supporting Information

Śledź et al. 10.1073/pnas.1305782110

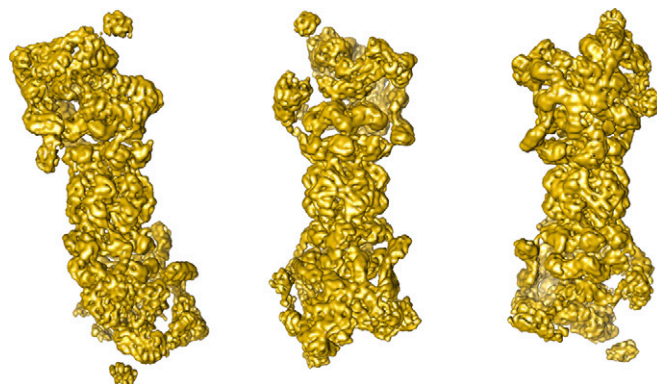

Fig. S1. Nonsymmetrized ( $C_1$ ) reconstruction of ATP- $\gamma 5$ -bound form of 26S proteasome from *Saccharomyces cerevisiae*.

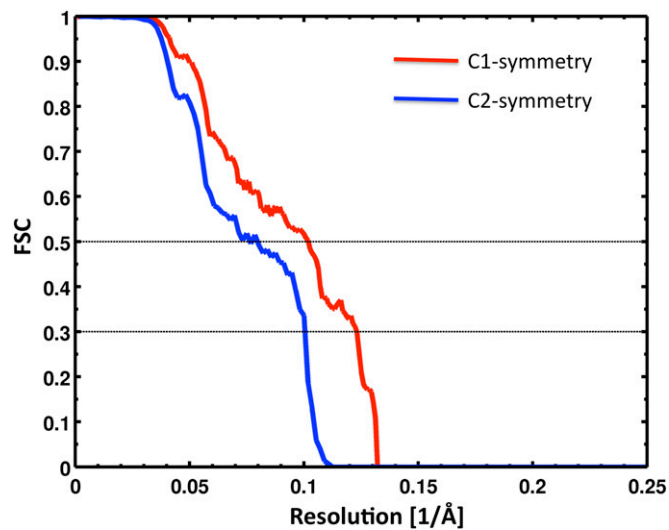

Fig. S2. Fourier-shell correlation (FSC) of  $C_1$ - and  $C_2$ -symmetrized reconstruction. To ensure the same effective particle numbers in both reconstructions, the  $C_2$  reconstruction has been carried out with 50% randomly chosen particles.

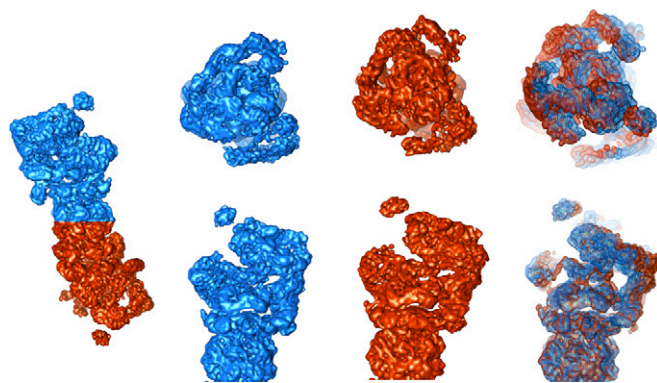

Fig. S3. Superposition of the two caps (half-proteasomes) from the ATP- $\gamma 5$  map.

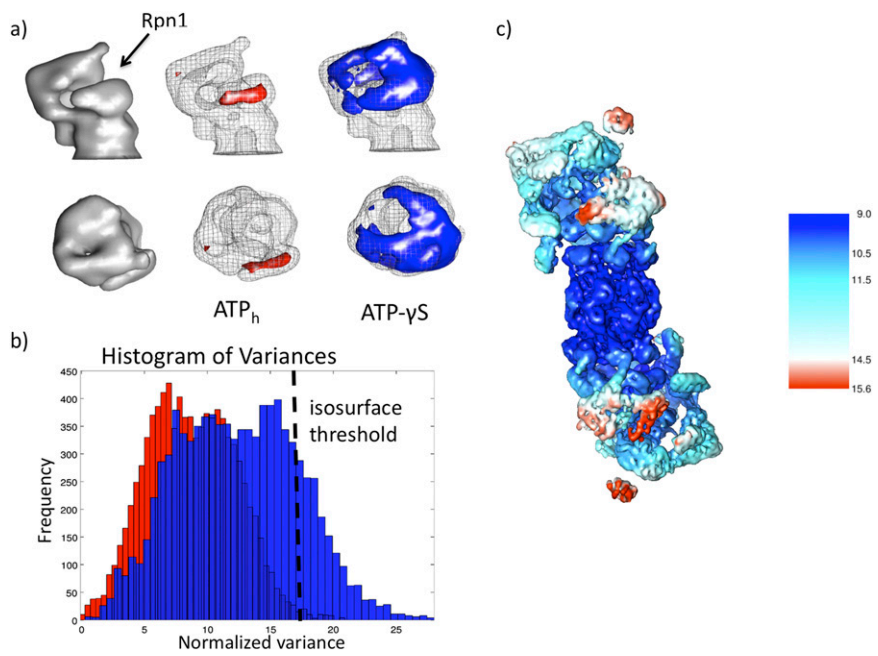

**Fig. S4.** (A) Variance maps of ATP- $\gamma$ S-bound and ATP-hydrolysing (ATP<sub>h</sub>) maps. The variance maps were normalized to the background. (B) Histogram of variances for both structures. (C) Local resolution of ATP- $\gamma$ S density. The isosurface is colored according to the local resolution as indicated by the color bar (in angstroms).

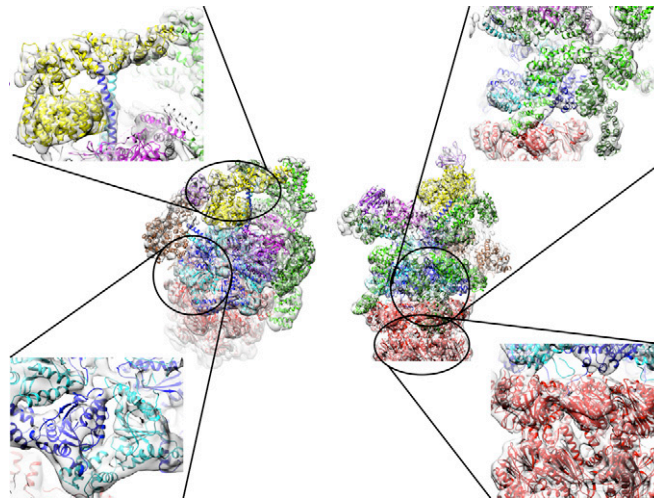

**Fig. S5.** Agreement between the pseudoatomic model of ATP- $\gamma$ S-bound proteasome and EM density. (Upper Left) Regulatory particle non-ATPase (Rpn) 2 subunit. (Upper Right) PCI (protease, COP9, and initiation factor 3) subunits. (Lower Left) AAA ATPases. (Lower Right) The 20S core particle.

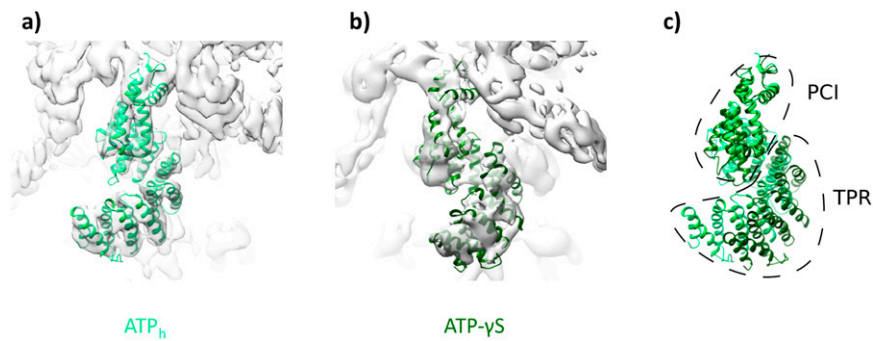

**Fig. 56.** Conformational changes of Rpn6 upon transition between the nucleotide states. (A) Rpn6 and corresponding EM density in ATP<sub>h</sub> structure. (B) Rpn6 and corresponding EM density in ATP-γS-bound structure. (C) Superposition of two models of Rpn6.

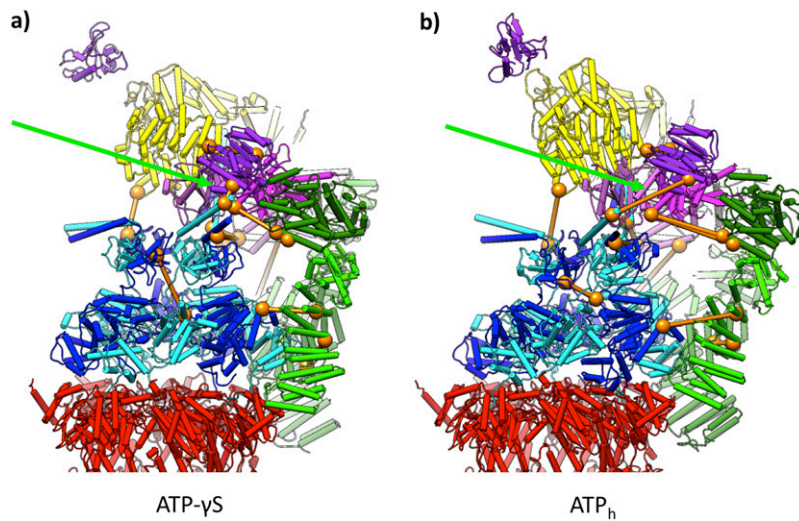

**Fig. 57.** Site-specific cross-links that display a large difference in length between ATP-γS-bound (A) and ATP<sub>h</sub> (B) structures. The arrow indicates the cross-link between Rpn10:K30 and regulatory particle AAA-ATPase (Rpt) 5:K45, which were 44 Å apart in the ATP<sub>h</sub> structure, whereas the distance is only ~10 Å in the ATP-γS-bound structure (C $\alpha$ -C $\alpha$  distances).

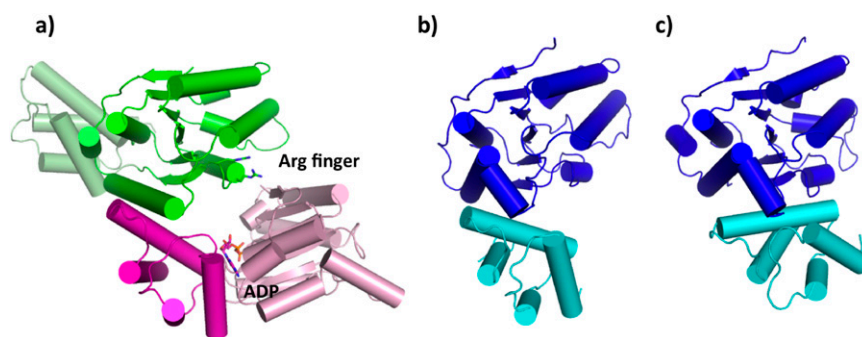

**Fig. 58.** Comparison of intersubunit module (ISM) structures. (A) ISM in the crystal structure of proteasome-activating nucleotidase-ADP (PDB ID code: 3H4M). (B) An open ISM<sub>1-5</sub> from the ATP<sub>h</sub> structure. The large AAA domain has been aligned to the same position as in A. (C) The closed ISM<sub>6-3</sub> seen from the ATP<sub>h</sub> structure. Again, the large AAA domain has been aligned to the same position as in A.

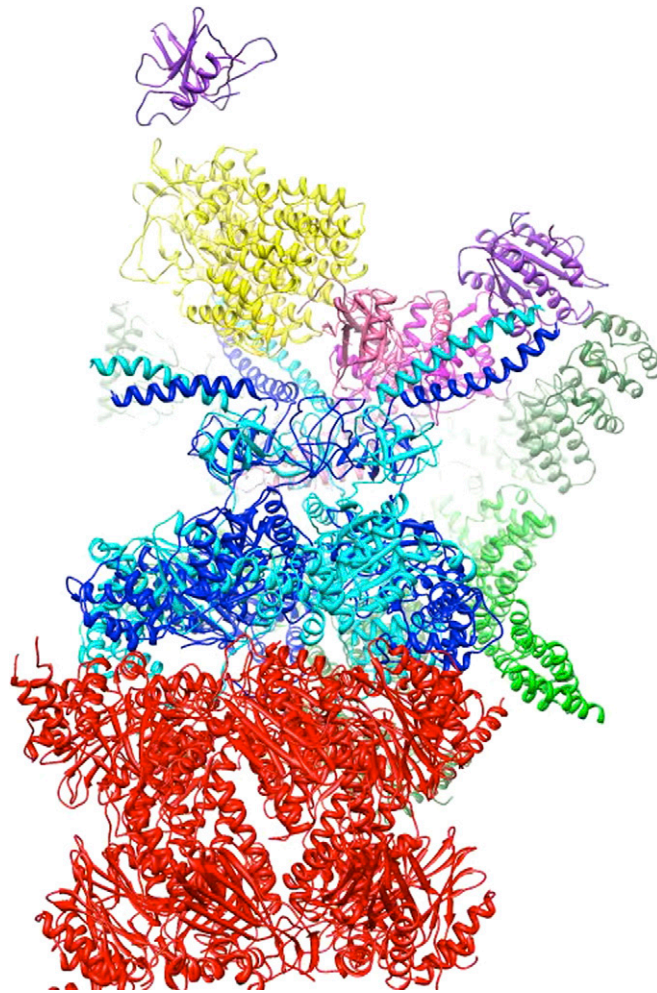

**Movie S1.** Morph between ATP<sub>h</sub> and ATP- $\gamma$ 5-bound structures as seen from the side.

[Movie S1](#)

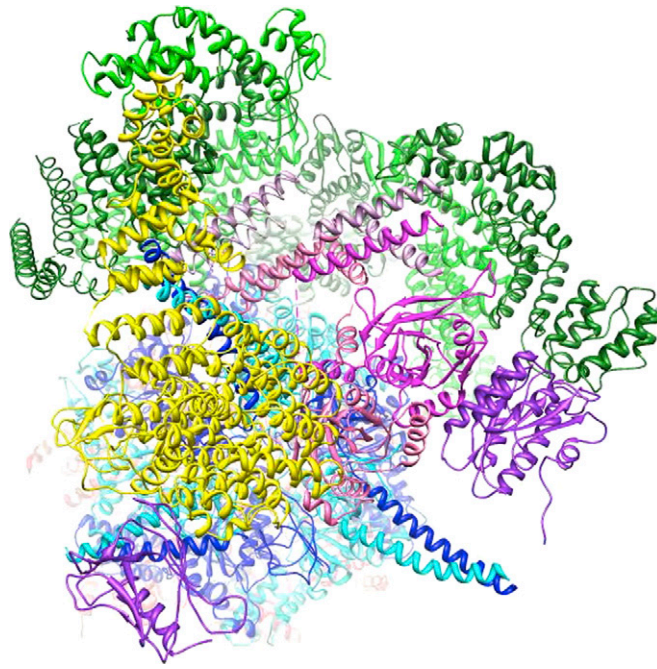

**Movie S2.** Morph between ATP<sub>n</sub> and ATP- $\gamma$ 5-bound structures as seen from the top.

[Movie S2](#)
